# Supplementary material
Source: publisher site journal article supplement (https://www.dovepress.com/article/389932)
Supplement: Supplementary file 1 [file get_supplementary_file.php]

Appendix Table topic guide based on four phases of experiential learning cycle by Kolb1

| **1. Concrete Experience** |  |
| --- | --- |
|  | Describe your experience in the event? (e.g. what was your role? …….Doing / having the experience |
| **2. Reflective Observation** |  |
|  | What did you like about the experience? |
|  | What did you dislike about this experience? |
|  | Share your feelings with us after this event? Prompt: how did it make you feel? |
|  | Reviewing reflecting on the experience |
| **3. Abstract Conceptualization** |  |
|  | What did you learn in this experience ? |
|  | Explain if this experience gave you new ideas? |
|  | Explain if this experience changed any exciting ideas? |
|  | What are the added values for you from this experience on the personal level and the career level? |
|  | Prompt: What are the advantages of these event for you and to the patient? |
|  | Concluding learning from the experience |
| **4. Active Experimentation** |  |
|  | Describe the things that you learned today and you plan to do in your practice |
|  | How will you try what you have learned? |
|  | Planning / trying out what you have learned |

1Kolb DA, Boyatzis RE, Mainemelis C. Experiential learning theory: previous research and new directions. In: Zhang L, ed. Perspectives on Thinking, Learning, and Cognitive Styles. Mahwah, NJ: Lawrence Erlbaum Associates Publishers; 2001: 227–47.
